# Supplementary material for: Efficacy and Safety of Artificial Tears Containing Lipidure and Hypromellose for the Treatment of Moderate Dry Eye Disease in Contact Lens Wearers
Source: MDPI journal article supplement (doi:10.3390/medicina60020287), 2024-02-08
Supplement: s1 [file s1]

## Supplementary material

The randomization scheme generated from the randomization.com

Nello studio proposto, metà dei soggetti riceveranno Respilac®, mentre l'altra metà una lacrima con solo HPMC e aminoacidi (Nextal) secondo lo schema di randomizzazione (dal sito randomization.com) come segue:

1. RespilAC\_\_\_\_\_
2. RespilAC\_\_\_\_\_
3. RespilAC\_\_\_\_\_
4. Next 300\_\_\_\_\_
5. Next 300\_\_\_\_\_
6. RespilAC\_\_\_\_\_
7. RespilAC\_\_\_\_\_
8. Next 300\_\_\_\_\_
9. Next 300\_\_\_\_\_
10. RespilAC\_\_\_\_\_
11. Next 300\_\_\_\_\_
12. RespilAC\_\_\_\_\_
13. Next 300\_\_\_\_\_
14. Next 300\_\_\_\_\_
15. Next 300\_\_\_\_\_

15. Next 300\_\_\_\_\_
16. RespilAC\_\_\_\_\_
17. Next 300\_\_\_\_\_
18. Next 300\_\_\_\_\_
19. RespilAC\_\_\_\_\_
20. RespilAC\_\_\_\_\_
21. Next 300\_\_\_\_\_
22. Next 300\_\_\_\_\_
23. Next 300\_\_\_\_\_
24. Next 300\_\_\_\_\_
25. Next 300\_\_\_\_\_
26. RespilAC\_\_\_\_\_
27. RespilAC\_\_\_\_\_
28. RespilAC\_\_\_\_\_
29. RespilAC\_\_\_\_\_
30. RespilAC\_\_\_\_\_
